# Supplementary material
Source: Copernicus journal article supplement (doi:10.5194/bg-23-3675-2026)
Supplement: Supplementary file 1 [file bg-23-3675-2026-supplement.pdf]

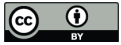

*Supplement of*

## **Sedimentary insights into organic matter alteration in Arctic Alaska’s saline permafrost**

**Fabian Seemann et al.**

*Correspondence to:* Fabian Seemann (fabian.seemann@awi.de)

The copyright of individual parts of the supplement might differ from the article licence.

Table S1: Characteristics of coring sites on the Utqiagvik Peninsula.

|                                                             | Upland     | West Twin Lake | East Twin Lake | DLB        | Thermokarst lagoon | Elson lagoon |
|-------------------------------------------------------------|------------|----------------|----------------|------------|--------------------|--------------|
| Coring date                                                 | 2022.04.21 | 2022.04.19     | 2022.04.20     | 2022.04.22 | 2022.04.20         | 2022.04.21   |
| Latitude                                                    | 71.27637   | 71.27396       | 71.2753        | 71.2772    | 71.2632            | 71.29008212  |
| Longitude                                                   | -156.45296 | -156.49699     | -156.45296     | -156.44311 | -156.42355         | -156.47186   |
| Elevation (m a.s.l.)                                        | 3.3        | 2.0            | 2.4            | 2.9        | 0.0                | 0.0          |
| Area (km <sup>2</sup> )                                     | n/a        | 1.306          | 1.276          | 1.051      | 0.801              | 125          |
| Sediment core length (cm)                                   | 204        | 23             | 259            | 142        | 46                 | 110          |
| Total sample number                                         | 34         | 4              | 26             | 26         | 10                 | 21           |
| Sediment physical state                                     | frozen     | unfrozen       | unfrozen       | frozen     | unfrozen           | semi-frozen  |
| Coring device                                               | SIPRE      | Push           | Vibra          | SIPRE      | SIPRE              | SIPRE        |
| Waterbody depth (cm)                                        | n/a        | 181            | 175            | n/a        | 94                 | 116          |
| Ice thickness (cm)                                          | n/a        | 175            | 146            | n/a        | 94                 | 116          |
| Total water depth (cm)                                      | n/a        | 181            | 175            | n/a        | 94                 | 116          |
| Liquid water temperature (°C)                               | n/a        | 0.04           | 0.30           | n/a        | -12.7              | -            |
| Liquid water electrical conductivity (mS cm <sup>-1</sup> ) | n/a        | 0.002          | 12.0           | n/a        | 20.2               | -            |

Table S2: Upland core photograph and description (picture: Fabian Seemann). In the top-left of the photograph, the top of the core is visible, and in the bottom-right the core bottom is located. The core is split in halves and cleaned in a climate chamber to reveal colors, structures and properties.

| Photograph                                                                         | Depth (cm)                         | Description                                                                                                                                 |
|------------------------------------------------------------------------------------|------------------------------------|---------------------------------------------------------------------------------------------------------------------------------------------|
|  | 0-3                                | Recent vegetation, dark brown.                                                                                                              |
|                                                                                    | 3-12                               | Light brown layers, ice lenses of 1 cm length between 4-8 cm, massive ice between 8-12 cm, silty, peat band of 2 cm diameter at 7 cm depth. |
|                                                                                    | 12-38                              | Ice-rich, dark/light brown cryoturbated, organic-rich, few macro plant remains at 27 cm, silty peat.                                        |
|                                                                                    | 38-69                              | Silty light grey, ataxitic, macro plant remains.                                                                                            |
|                                                                                    | 69-83                              | ice-rich, dark brown, organic-rich, cryoturbation at 77-82 cm.                                                                              |
|                                                                                    | 83-133                             | Light-grey silty, no organic remains visible, very ice-rich, reticular ice lenses.                                                          |
|                                                                                    | 133-174                            | Grey (darker than above), silty, reticula and lenticula ice lenses, ice bands.                                                              |
|                                                                                    | 174-193                            | Darker than above, very ice-rich (50 %), silty, thick lenses (1 cm chaotically orientated), no organics visible.                            |
| 193-204                                                                            | Ataxitic with sediment inclusions. |                                                                                                                                             |

Table S3: West Twin Lake core photograph and description (picture: Fabian Seemann).

| Photograph                                                                          | Depth (cm) | Description                                                                             |
|-------------------------------------------------------------------------------------|------------|-----------------------------------------------------------------------------------------|
|  | 0-23       | Blackish brown, poorly decomposed organic matter, no minerals visible, drier downwards. |

Table S4: East Twin Lake core photograph and description (pictures: Fabian Seemann). The core is compressed by 118 cm due to vibration during coring.

| Photograph                                                                          | Depth (cm) | Description                                                                                                   |
|-------------------------------------------------------------------------------------|------------|---------------------------------------------------------------------------------------------------------------|
|   | 0-15       | Dark brown, macro-remains, poorly decomposed, high water content, no minerals visible.                        |
|                                                                                     | 15-22      | Lighter brown to grey-ish, fine minerals, poorly decomposed organics, macro-remains.                          |
|                                                                                     | 22-27      | Black/brown (organics), grey-blue-ish (minerals).                                                             |
|                                                                                     | 27-51      | High water content, fine sand, silty, yellow-ish, grey, few macro remains.                                    |
|                                                                                     | 51-60      | As above but more oxidized, more orange, lower water content, woody macro remains at 59 cm.                   |
|                                                                                     | 60-80      | Black-ish, dark grey to medium grey, less water content, no plant macro remains, visible fines (clayey silt). |
|                                                                                     | 80-93      | Dark grey-ish, black, coarser as above, oxidized, organic inclusions (brown grey).                            |
|                                                                                     | 93-108     | Continuation of brownish-grey silty material.                                                                 |
|                                                                                     | 108-128    | Dark, blackish-grey, silty and denser.                                                                        |
|                                                                                     | 128-138    | Same color but less dense, more water due to higher pore space.                                               |
|  |            |                                                                                                               |

Table S5: Drained Lake Basin core photograph and description (pictures: Fabian Seemann).

| Photograph                                                                         | Depth (cm) | Description                                                                                                                                              |
|------------------------------------------------------------------------------------|------------|----------------------------------------------------------------------------------------------------------------------------------------------------------|
|  | 0-14       | Water saturated peat, 8-14 cm partly decomposed peat, black/brown.                                                                                       |
|                                                                                    | 14-18      | Less water saturated, more peat than water, first sediment inclusions.                                                                                   |
|                                                                                    | 18-21      | Transition peat to silt, brown grey, diagonal macro-lense (3*0.5 cm horizontal wavy micro-lenses).                                                       |
|                                                                                    | 21-29      | Brown grey, silt, horizontal macro-lense 1*0,5 cm, two large vertical cracks (6 cm long, 0.5 cm wide).                                                   |
|                                                                                    | 29-33      | Pure peat (sec. Lake phase prob.), brown to light brown.                                                                                                 |
|                                                                                    | 33-79      | Ich-rich, lenticula (max. 0.5 cm thick), also reticula structure, at 39 cm (1*1 cm) organic inclusion, at 45-52 cm and 62-71 thicker ice lense.          |
|                                                                                    | 79-93      | Cryoturbated horizon, black-brown (org.)-grey (sandy silt) turbations, 90-93 cm black band, thin ice-lenses 1 mm, 3 cm long.                             |
|                                                                                    | 93-97      | Sandy-silt band, ice band 1 mm horizontal 5 cm long, more smaller ice bands vertical + horizontal, at 96-97 cm black circular structure (1 cm diameter). |
|                                                                                    | 97-104     | Brown matrix with macro remains, sandy silt, mixed with black (highly decomposed) fine silts.                                                            |
|                                                                                    | 104-107    | Sandy silt, grey, macro remains, few micro-lenses.                                                                                                       |
|                                                                                    | 107-115    | Dark black, highly decomposed.                                                                                                                           |
|                                                                                    | 115-122    | Brown grey, sandy silt, black dots of 0.5 cm, structureless.                                                                                             |
|                                                                                    | 122-131    | As above, less black, ice-rich along the core-side.                                                                                                      |
|                                                                                    | 131-142    | Sandy silt, with micro-lenses (horizontal, few vertical), like above concerning ice content.                                                             |

Table S6: Semi-open thermokarst lagoon core photograph and description (pictures: Fabian Seemann).

| Photograph                                                                        | Depth (cm) | Description                                                       |
|-----------------------------------------------------------------------------------|------------|-------------------------------------------------------------------|
|  | 0-2        | Grey, brown, fines.                                               |
|                                                                                   | 2-9        | Black, loose organics, ice-bands without orientation 1 mm.        |
|                                                                                   | 9-11       | Brown grey, fines, organic-rich, vertical ice-bands 1 mm.         |
|                                                                                   | 11-12      | Grey, silt band.                                                  |
|                                                                                   | 12-23      | Like at 2-9 cm, fine laminated, black, organic-rich.              |
|                                                                                   | 23-31      | Laminated with wider (4-5 mm), vertical ice-bands, greyish black. |
|                                                                                   | 31-40      | Laminated, wider than above, no ice-bands.                        |
|                                                                                   | 40-43      | Black, brown, laminated.                                          |
|                                                                                   | 43-46      | Black dots, not laminated.                                        |

Table S7: Elson Lagoon core photograph and description (pictures: Fabian Seemann).

| Photograph                                                                          | Depth (cm)                                                                                                        | Description                                                                                                                                 |
|-------------------------------------------------------------------------------------|-------------------------------------------------------------------------------------------------------------------|---------------------------------------------------------------------------------------------------------------------------------------------|
|  | 0-6                                                                                                               | Dark brown, fine laminated, un-orientated 2 mm ice-bands.                                                                                   |
|                                                                                     | 6-9                                                                                                               | 3-4 mm thick ice-bands, un-orientated, more ice than above, brown.                                                                          |
|                                                                                     | 9-16                                                                                                              | Unfrozen structureless, dark brown.                                                                                                         |
|                                                                                     | 16-27                                                                                                             | Horizontal laminations, 3-4mm, black, brown, grey, silty; at 16-24 cm horizontal ice bands 1 mm thick, at 24-27 cm un-orientated ice-bands. |
|                                                                                     | 27-31                                                                                                             | 3 laminations: light brown, grey.                                                                                                           |
|                                                                                     | 31-36                                                                                                             | Horizontal ice-bands 2-4 mm wide.                                                                                                           |
|                                                                                     | 36-37                                                                                                             | Finer than above, thin horizontal ice-bands.                                                                                                |
|                                                                                     | 37-44                                                                                                             | Horizontal ice-bands, laminated, coarser than above, silty.                                                                                 |
|                                                                                     | 44-63                                                                                                             | Un-orientated ice-bands 1-3 mm wide, light brown grey, laminations.                                                                         |
|                                                                                     | 63-65                                                                                                             | Very fine laminations, brighter downwards, fine vertical ice-bands.                                                                         |
|                                                                                     | 65-66                                                                                                             | Like at 44-63 cm but darker.                                                                                                                |
|                                                                                     | 66-78                                                                                                             | Ice-bands 1 mm wide from vertical to horizontal (cryoturbated?), dark dots in bright silt.                                                  |
|                                                                                     | 78-93                                                                                                             | Laminations dark black, brown, sand (at 79 cm, 84 cm) microlenses vertical and horizontal (potentially through deformation).                |
|                                                                                     | 93-98                                                                                                             | Sandy silt to silty sand transition, brownish grey, lighter than above.                                                                     |
|                                                                                     | 98-101                                                                                                            | Sand layer, 3 rounded pebbles (diameter 2 cm), 1 pebble of granite (?).                                                                     |
| 101-110                                                                             | Sediment layers of 0.5 cm brown, grey, black, slightly; u-shaped (deformation by corer?), silty sand, sandy silt. |                                                                                                                                             |

Table S8: Radiocarbon data.

| AWI<br>MICADAS<br>sample ID* | Sample label      | Depth<br>(cm) | Material dated | <sup>14</sup> C age<br>(yr BP) | +/- | Calibrated age 2s<br>range (yr cal<br>BP)** | Mean<br>calibrated<br>age (yr cal<br>BP) |
|------------------------------|-------------------|---------------|----------------|--------------------------------|-----|---------------------------------------------|------------------------------------------|
| 12524.1.1                    | BRW22-UL 5-14     | 7.5           | Plant remains  | -157                           | 54  |                                             | modern                                   |
| 12525.1.1                    | BRW22-UL 25-30    | 27.5          | Plant remains  | 5,734                          | 69  | 6,392-6,675                                 | 6,534                                    |
| 12526.1.1                    | BRW22-UL 50-55    | 52.5          | Plant remains  | 5,931                          | 72  | 6,604-6,946                                 | 6,775                                    |
| 12527.1.1                    | BRW22-UL 70-80    | 75            | Plant remains  | 6,105                          | 73  | 6,785-7,165                                 | 6,975                                    |
| 12528.1.1                    | BRW22-UL 98-106   | 102           | Plant remains  | 6,074                          | 76  | 6,777-7,159                                 | 6,968                                    |
| 12529.1.1                    | BRW22-UL 123-128  | 125.5         | Plant remains  | 6,394                          | 77  | 7,161-7,430                                 | 7,296                                    |
| 12530.1.1                    | BRW22-UL 180-192  | 186           | Bulk sediment  | 11,413                         | 32  | 13,179-13,347                               | 13,263                                   |
| 12520.1.1                    | BRW22-WTL 3-13    | 8             | Plant remains  | 2,285                          | 60  | 2,121-2,432                                 | 2,277                                    |
| 12521.1.1                    | BRW22-ETL 3-13    | 8***          | Plant remains  | 2,810                          | 64  | 2,765-3,075                                 | 2,920                                    |
| 12522.1.1                    | BRW22-ETL 70-80   | 75***         | Bulk sediment  | 23,542                         | 60  | 27,596-27,863                               | 27,730                                   |
| 12523.1.1                    | BRW22-ETL 116-126 | 121***        | Bulk sediment  | 38,823                         | 194 | 42,371-42,761                               | 42,566                                   |
| 12531.1.1                    | BRW22-DLB 19-22   | 20.5          | Plant remains  | 709                            | 57  | 623-729                                     | 676                                      |
| 12532.1.1                    | BRW22-DLB 26-35   | 30.5          | Plant remains  | 1,311                          | 30  | 1,242-1,294                                 | 1,268                                    |
| 12533.1.1                    | BRW22-DLB 50-55   | 52.5          | Plant remains  | 2,129                          | 107 | 1,865-2,342                                 | 2,104                                    |
| 12534.1.1                    | BRW22-DLB 70-77   | 73.5          | Plant remains  | 9,348                          | 87  | 10,255-10,768                               | 10,512                                   |
| 12535.1.1                    | BRW22-DLB 105-110 | 107.5         | Plant remains  | 8,842                          | 36  | 9,723-9,968                                 | 9,846                                    |
| 12536.1.1                    | BRW22-DLB 131-142 | 136.5         | Bulk sediment  | 29,541                         | 87  | 33,877-34,376                               | 34,127                                   |
| 12540.1.1                    | BRW22-SOL 16-21   | 18.5          | Plant remains  | 6,369                          | 142 | 6,949-7,514                                 | 7,232                                    |
| 12541.1.1                    | BRW22-SOL 41-46   | 43.5          | Plant remains  | 4,096                          | 114 | 4,290-4,860                                 | 4,575                                    |

|           |                |      |               |       |     |             |       |
|-----------|----------------|------|---------------|-------|-----|-------------|-------|
| 12537.1.1 | BRW22-EL 0-4   | 2    | Plant remains | 4,811 | 111 | 5,308-5,753 | 5,531 |
| 12538.1.1 | BRW22-EL 34-39 | 36.5 | Plant remains | 4,694 | 114 | 5,046-5,605 | 5,326 |
| 12539.1.1 | BRW22-EL 74-78 | 76   | Plant remains | 5,312 | 84  | 5,929-6,224 | 6,077 |

---

\* AWI MICADAS sample number based on Mollenhauer et al.(2021).

\*\* Radiocarbon calibration was conducted using Calib 8.20 software and the IntCal 20 calibration curve (Reimer et al., 2020; Stuiver and Reimer, 1993).

\*\*\*East Twin Lake core 118 cm compressed

Table S9: Summary statistics and Kruskal-Wallis test results for geochemical parameters across thermal regimes. Sample count (n) in individual groups with reduced number after n/a removal in brackets (only samples with complete TOC, C:N, and  $\delta^{13}\text{C}$  data were tested). *Seasonally frozen* is composed of upland (n = 8) and DLB (n = 9) samples, *perennially frozen* of upland samples, and *unfrozen* of West (n = 4, effectively 3) and East Twin Lake (n = 26, effectively 6) samples. *Refrozen* samples represent DLB samples, and *lagoon* samples are from the semi-open thermokarst lagoon (n = 10, effectively 9) and Elson Lagoon (n = 21, effectively 17). Data are presented as mean  $\pm$  SD (standard deviation) and median  $\pm$  IQR (interquartile range). Kruskal-Wallis test statistics:  $\chi^2$  = chi-squared statistic, df = degrees of freedom, p = probability value.  $\epsilon^2$  (epsilon-squared) is the effect size measure for non-parametric tests, interpreted as: <0.01 = negligible, 0.01-0.04 = small, 0.04-0.16 = medium, 0.16-0.36 = large, >0.36 = very large effect.

| Thermal regime        | n          | TOC (wt%)                                                                     |                | C:N ratio                                                      |                | $\delta^{13}\text{C}$ (‰ vs. VPDB)                           |                |
|-----------------------|------------|-------------------------------------------------------------------------------|----------------|----------------------------------------------------------------|----------------|--------------------------------------------------------------|----------------|
|                       |            | Mean (SD)                                                                     | Median (IQR)   | Mean (SD)                                                      | Median (IQR)   | Mean (SD)                                                    | Median (IQR)   |
| Seasonally frozen     | 17         | 18.7<br>( $\pm 13.2$ )                                                        | 16.6<br>(14.3) | 20.5<br>( $\pm 4.6$ )                                          | 20.0<br>(4.6)  | -27.6<br>( $\pm 1.1$ )                                       | -27.8<br>(1.7) |
| Frozen                | 26         | 10.7<br>( $\pm 5.6$ )                                                         | 7.3<br>(7.6)   | 16.1<br>( $\pm 2.4$ )                                          | 14.8<br>(4.1)  | -27.7<br>( $\pm 0.5$ )                                       | -27.8<br>(0.6) |
| Unfrozen              | 30<br>(9)  | 4.7<br>( $\pm 5.9$ )                                                          | 1.6<br>(5.1)   | 12.6<br>( $\pm 6.6$ )                                          | 16.9<br>(13.1) | -26.7<br>( $\pm 1.3$ )                                       | -25.9<br>(2.4) |
| Refrozen              | 17         | 6.5<br>( $\pm 8.0$ )                                                          | 2.7<br>(5.2)   | 17.4<br>( $\pm 4.2$ )                                          | 16.0<br>(3.7)  | -27.3<br>( $\pm 0.9$ )                                       | -27.4<br>(1.2) |
| Lagoon                | 31<br>(26) | 4.9<br>( $\pm 1.9$ )                                                          | 5.1<br>(2.1)   | 17.5<br>( $\pm 1.4$ )                                          | 17.6<br>(2.3)  | -27.4<br>( $\pm 0.7$ )                                       | -27.6<br>(0.2) |
| <b>Kruskal Wallis</b> |            | $\chi^2 = 46.9$ , df = 4,<br>p = $1.62 \times 10^{-9}$ , $\epsilon^2 = 0.391$ |                | $\chi^2 = 20.8$ , df = 4,<br>p = 0.00034, $\epsilon^2 = 0.173$ |                | $\chi^2 = 12.1$ , df = 4,<br>p = 0.017, $\epsilon^2 = 0.100$ |                |

Table S10: Summary statistics and Kruskal-Wallis test results for geochemical parameters across salinity classes. Sample count (n) in individual groups with reduced number after n/a removal in brackets (only samples with complete TOC, C:N, and  $\delta^{13}\text{C}$  data were tested). *Freshwater* (< 1.5 mS cm<sup>-1</sup>) is composed of upland (n = 24) and DLB (n = 3) samples. *Brackish* (1.5-15 mS cm<sup>-1</sup>) includes upland (n = 9), West Twin Lake (n = 4, effectively 3), Est Twin Lake (n = 2), and DLB (n = 19) samples. *Saline* (15-50 mS cm<sup>-1</sup>) comprises upland (n = 1), East Twin Lake (n = 24, effectively 4) and DLB (n = 4) samples. *Hypersaline* (>50 mS cm<sup>-1</sup>) samples comprise semi-open thermokarst lagoon (n = 10, effectively 9) and Elson Lagoon (n = 21, effectively 17) porewaters. Data are presented as mean  $\pm$  SD (standard deviation) and median  $\pm$  IQR (interquartile range). Kruskal-Wallis test statistics:  $\chi^2$  = chi-squared statistic, df = degrees of freedom, p = probability value.  $\epsilon^2$  (epsilon-squared) is the effect size measure for non-parametric tests, interpreted as: <0.01 = negligible, 0.01-0.04 = small, 0.04-0.16 = medium, 0.16-0.36 = large, >0.36 = very large effect.

| Salinity class        | n          | TOC (wt%)                                                                       |                | C:N ratio                                                                      |               | $\delta^{13}\text{C}$ (‰ vs. VPDB)                                             |                |
|-----------------------|------------|---------------------------------------------------------------------------------|----------------|--------------------------------------------------------------------------------|---------------|--------------------------------------------------------------------------------|----------------|
|                       |            | Mean (SD)                                                                       | Median (IQR)   | Mean (SD)                                                                      | Median (IQR)  | Mean (SD)                                                                      | Median (IQR)   |
| Freshwater            | 27         | 15.5<br>( $\pm 9.2$ )                                                           | 16.2<br>(12.5) | 18.4<br>( $\pm 3.1$ )                                                          | 18.6<br>(5.1) | -27.5<br>( $\pm 0.8$ )                                                         | -27.6<br>(1.3) |
| Brackish              | 34<br>(33) | 10.8<br>( $\pm 9.5$ )                                                           | 7.4<br>(9.3)   | 17.7<br>( $\pm 4.4$ )                                                          | 16.9<br>(4.1) | -27.9<br>( $\pm 0.7$ )                                                         | -28.0<br>(1.0) |
| Saline                | 29<br>(9)  | 2.1<br>( $\pm 1.9$ )                                                            | 1.6<br>(0.7)   | 10.4<br>( $\pm 5.0$ )                                                          | 12.7<br>(9.2) | -26.3<br>( $\pm 0.9$ )                                                         | -25.8<br>(0.8) |
| Hypersaline           | 31<br>(26) | 4.9<br>( $\pm 1.9$ )                                                            | 5.1<br>(2.1)   | 17.5<br>( $\pm 1.4$ )                                                          | 17.6<br>(2.3) | -27.4<br>( $\pm 0.7$ )                                                         | -27.6<br>(0.2) |
| <b>Kruskal Wallis</b> |            | $\chi^2 = 68.33$ , df = 3,<br>p = $9.74 \times 10^{-15}$ , $\epsilon^2 = 0.569$ |                | $\chi^2 = 23.25$ , df = 3,<br>p = $3.57 \times 10^{-5}$ , $\epsilon^2 = 0.194$ |               | $\chi^2 = 40.40$ , df = 3,<br>p = $8.77 \times 10^{-9}$ , $\epsilon^2 = 0.337$ |                |

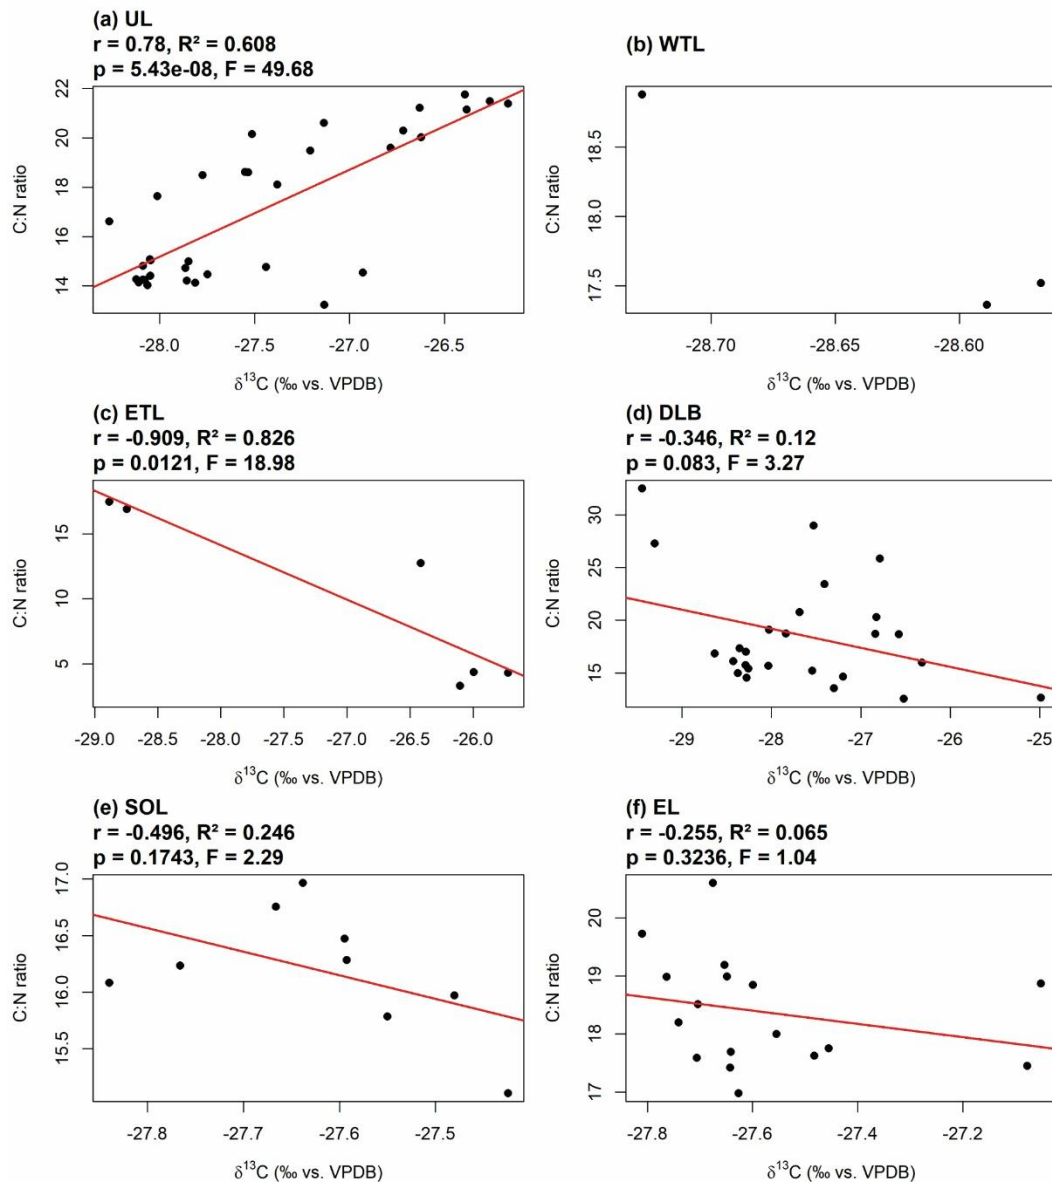

Figure S1: Correlation plots between C:N ratio and  $\delta^{13}\text{C}$  (‰ vs. VPDB) for the different study sites: (a) UL (upland), (b) WTL (West Twin Lake), (c) ETL (East Twin Lake), (d) DLB (drained lake basin), (e) SOL (semi-open thermokarst lagoon), and (f) EL (Elson Lagoon).

## References

Mollenhauer, G., Grotheer, H., Gentz, T., Bonk, E., and Hefter, J.: Standard operation procedures and performance of the MICADAS radiocarbon laboratory at Alfred Wegener Institute (AWI), Germany, Nuclear Instruments and Methods in Physics Research Section B: Beam Interactions with Materials and Atoms, 496, 45–51, <https://doi.org/10.1016/j.nimb.2021.03.016>, 2021.

Reimer, P. J., Austin, W. E. N., Bard, E., Bayliss, A., Blackwell, P. G., Ramsey, C. B., Butzin, M., Cheng, H., Edwards, R. L., Friedrich, M., Grootes, P. M., Guilderson, T. P., Hajdas, I., Heaton, T. J., Hogg, A. G., Hughen, K. A., Kromer, B., Manning, S. W., Muscheler, R., Palmer, J. G., Pearson, C., Plicht, J. van der, Reimer, R. W., Richards, D. A., Scott, E. M., Southon, J. R., Turney, C. S. M., Wacker, L., Adolphi, F., Büntgen, U., Capano, M., Fahrni, S. M., Fogtmann-Schulz, A., Friedrich, R., Köhler, P., Kudsk, S., Miyake, F., Olsen, J., Reinig, F., Sakamoto, M., Sookdeo, A., and Talamo, S.: The IntCal20 Northern Hemisphere Radiocarbon Age Calibration Curve (0–55 cal kBP), *Radiocarbon*, 62, 725–757, <https://doi.org/10.1017/RDC.2020.41>, 2020.

Stuiver, M. and Reimer, P. J.: Extended 14C Data Base and Revised CALIB 3.0 14C Age Calibration Program, *Radiocarbon*, 35, 215–230, <https://doi.org/10.1017/S0033822200013904>, 1993.
